# Supplementary material
Source: HighWire-hosted journal article supplement (https://www.cmajopen.ca/highwire/filestream/81029/field_highwire_adjunct_files/0/open-2016-0152-1-at.pdf)
Supplement: open-2016-0152-1-at.pdf [file open-2016-0152-1-at.pdf]

## **Appendix 1 (as supplied by the authors): Survey questionnaire**

# Canadian MD/PhD program alumni survey

\*Required

## Part 1 of 6: Basic information

---

1. First name \*

.....

2. Last name \*

.....

3. At what university did you attend medical school? \*

*Mark only one oval.*

- ☐ McGill University
- ☐ McMaster University
- ☐ Queen's University
- ☐ University of Alberta
- ☐ University of British Columbia
- ☐ University of Calgary
- ☐ University of Manitoba
- ☐ University of Ottawa
- ☐ University of Saskatchewan
- ☐ University of Toronto
- ☐ University of Western Ontario
- ☐ Other

4. If your medical school was not listed above,  
please enter it here

.....

5. When did you enter a combined MD/PhD program? \*

If you entered a combined MD/PhD program in the middle of a medical or graduate degree, please include time spent in that degree program. The day of the month on which you entered a combined MD/PhD program will not be used to interpret results.

.....  
*Example: 15 December 2012*

6. When did you graduate from a combined MD/PhD program? \*

The day of the month on which you graduated from a combined MD/PhD program will not be used to interpret results.

.....  
*Example: 15 December 2012*

## Part 2 of 6: Demographic data

7. How old are you?

.....

8. What is your sex?

*Mark only one oval.*

- ☐ Male
- ☐ Female

9. Describe your ethno-cultural background

*Tick all that apply.*

- ☐ Aboriginal or First Nations
- ☐ Asian
- ☐ Black
- ☐ Hispanic
- ☐ White
- ☐ Other: .....

## Part 3 of 6: Education

10. Have you completed any degrees other than the combined MD/PhD?

*Tick all that apply.*

- ☐ B.A.
- ☐ B.Sc.
- ☐ B.Eng.
- ☐ B.HSc.
- ☐ B.ScN.
- ☐ M.A.
- ☐ M.Sc.
- ☐ M.P.H.
- ☐ M.B.A.
- ☐ Other: .....

11. Have you completed residency training? \*

*Mark only one oval.*

- ☐ Yes
- ☐ No, but I am currently completing my residency
- ☐ No, but I plan to
- ☐ No, and I do not plan to

**12. If you have completed or are currently completing residency training, was this specialty your first choice?**

*Mark only one oval.*

- ☐ Yes, and at my first choice location
- ☐ Yes, but not at my first choice location
- ☐ No, but at my first choice location
- ☐ No, and not at my first choice location

**13. If you have completed or are currently completing residency training, what residency program did you enter?**

*Mark only one oval.*

- ☐ Anatomical Pathology
- ☐ Anesthesiology
- ☐ Cardiac Surgery
- ☐ Dermatology
- ☐ Diagnostic Radiology
- ☐ Emergency Medicine
- ☐ General Pathology
- ☐ General Surgery
- ☐ Hematological Pathology
- ☐ Internal Medicine
- ☐ Medical Biochemistry
- ☐ Medical Genetics
- ☐ Medical Microbiology
- ☐ Neurology
- ☐ Neuropathology
- ☐ Neurosurgery
- ☐ Nuclear Medicine
- ☐ Obstetrics and Gynecology
- ☐ Ophthalmology
- ☐ Orthopedic Surgery
- ☐ Otolaryngology — Head and Neck Surgery
- ☐ Pediatrics
- ☐ Physical Medicine and Rehabilitation
- ☐ Plastic Surgery
- ☐ Public Health and Preventive Medicine
- ☐ Psychiatry
- ☐ Radiation Oncology
- ☐ Urology
- ☐ Vascular Surgery
- ☐ Other

14. Have you completed or are you currently completing other postdoctoral training? \*

*Mark only one oval.*

☐

Clinical fellowship

☐

Research fellowship

☐

No other postdoctoral training

☐

Other:

.....

15. If you consider your clinician-scientist training complete, what was the total length of your training in years, beginning with your entry into an MD/PhD program? Please include all residency, fellowship, and other training you feel has contributed to your career as a clinician-scientist since your entry into an MD/PhD program.

NOTE: please only answer this question if you consider your clinician-scientist training complete.  
*Mark only one oval.*

- ☐ 1
- ☐ 2
- ☐ 3
- ☐ 4
- ☐ 5
- ☐ 6
- ☐ 7
- ☐ 8
- ☐ 9
- ☐ 10
- ☐ 11
- ☐ 12
- ☐ 13
- ☐ 14
- ☐ 15
- ☐ 16
- ☐ 17
- ☐ 18
- ☐ 19
- ☐ 20
- ☐ 21
- ☐ 22
- ☐ 23
- ☐ 24
- ☐ 25
- ☐ 26
- ☐ 27
- ☐ 28
- ☐ 29
- ☐ 30
- ☐ 31
- ☐ 32
- ☐ 33
- ☐ 34
- ☐ 35
- ☐ 36

- ☐ 37
- ☐ 38
- ☐ 39
- ☐ 40
- ☐ 41+

## Attitude questions

---

Please respond to the following questions based on the degree to which you agree or disagree with the statements presented.

**16. Overall, I am satisfied with the quality of my medical education.**

*Mark only one oval.*

|                   |                       |                       |                       |                       |                       |                |
|-------------------|-----------------------|-----------------------|-----------------------|-----------------------|-----------------------|----------------|
|                   | 1                     | 2                     | 3                     | 4                     | 5                     |                |
| Strongly disagree | <input type="radio"/> | <input type="radio"/> | <input type="radio"/> | <input type="radio"/> | <input type="radio"/> | Strongly agree |

**17. Overall, I am satisfied with the quality of my clinician-scientist training.**

*Mark only one oval.*

|                   |                       |                       |                       |                       |                       |                |
|-------------------|-----------------------|-----------------------|-----------------------|-----------------------|-----------------------|----------------|
|                   | 1                     | 2                     | 3                     | 4                     | 5                     |                |
| Strongly disagree | <input type="radio"/> | <input type="radio"/> | <input type="radio"/> | <input type="radio"/> | <input type="radio"/> | Strongly agree |

**18. If I could revisit my choice, I would choose to attend a MD/PhD program again.**

*Mark only one oval.*

|                   |                       |                       |                       |                       |                       |                |
|-------------------|-----------------------|-----------------------|-----------------------|-----------------------|-----------------------|----------------|
|                   | 1                     | 2                     | 3                     | 4                     | 5                     |                |
| Strongly disagree | <input type="radio"/> | <input type="radio"/> | <input type="radio"/> | <input type="radio"/> | <input type="radio"/> | Strongly agree |

**19. If I could revisit my choice, I would choose to attend medical school again.**

*Mark only one oval.*

|                   |                       |                       |                       |                       |                       |                |
|-------------------|-----------------------|-----------------------|-----------------------|-----------------------|-----------------------|----------------|
|                   | 1                     | 2                     | 3                     | 4                     | 5                     |                |
| Strongly disagree | <input type="radio"/> | <input type="radio"/> | <input type="radio"/> | <input type="radio"/> | <input type="radio"/> | Strongly agree |

**20. If I could revisit my choice, I would choose to attend a PhD or combined PhD program again.**

*Mark only one oval.*

|                   |                       |                       |                       |                       |                       |                |
|-------------------|-----------------------|-----------------------|-----------------------|-----------------------|-----------------------|----------------|
|                   | 1                     | 2                     | 3                     | 4                     | 5                     |                |
| Strongly disagree | <input type="radio"/> | <input type="radio"/> | <input type="radio"/> | <input type="radio"/> | <input type="radio"/> | Strongly agree |

## Part 4 of 6: Career trajectory

**21. What is the organizational type of your current appointment? \***

*Tick all that apply.*

- ☐ Academic institution
- ☐ Government or private research institute
- ☐ Industry
- ☐ Private or hospital clinical practice
- ☐ Currently unemployed
- ☐ Other: .....

**22. What is the location of your current appointment?**

*Mark only one oval.*

- ☐ Canada
- ☐ United States
- ☐ Central/South America
- ☐ Asia
- ☐ Africa
- ☐ Middle East
- ☐ Other: .....

**23. What title best corresponds to your current position? \***

*Mark only one oval.*

- ☐ Resident
- ☐ Clinical fellow/research fellow
- ☐ Instructor/adjunct professor
- ☐ Assistant professor/staff scientist
- ☐ Associate professor/senior scientist
- ☐ Professor/section chief
- ☐ Department chair/director
- ☐ Other: .....

**24. Do you have protected research time at your current position? \***

*Mark only one oval.*

- ☐ Yes
- ☐ No





**29. I am engaged in health services research.**

The Canadian Institutes of Health Research defines health services research as research designed to improve the way health care services are organized, regulated, managed, financed, paid for, used and delivered.

*Mark only one oval.*

|                   | 1                     | 2                     | 3                     | 4                     | 5                     |                |
|-------------------|-----------------------|-----------------------|-----------------------|-----------------------|-----------------------|----------------|
| Strongly disagree | <input type="radio"/> | <input type="radio"/> | <input type="radio"/> | <input type="radio"/> | <input type="radio"/> | Strongly agree |

**30. I am satisfied with my work-life balance.**

*Mark only one oval.*

|                   | 1                     | 2                     | 3                     | 4                     | 5                     |                |
|-------------------|-----------------------|-----------------------|-----------------------|-----------------------|-----------------------|----------------|
| Strongly disagree | <input type="radio"/> | <input type="radio"/> | <input type="radio"/> | <input type="radio"/> | <input type="radio"/> | Strongly agree |

**31. I will be substantially involved in research in the future. \***

*Mark only one oval.*

|                   | 1                     | 2                     | 3                     | 4                     | 5                     |                |
|-------------------|-----------------------|-----------------------|-----------------------|-----------------------|-----------------------|----------------|
| Strongly disagree | <input type="radio"/> | <input type="radio"/> | <input type="radio"/> | <input type="radio"/> | <input type="radio"/> | Strongly agree |

**32. The combined MD/PhD degree has helped my career. \***

*Mark only one oval.*

|                   | 1                     | 2                     | 3                     | 4                     | 5                     |                |
|-------------------|-----------------------|-----------------------|-----------------------|-----------------------|-----------------------|----------------|
| Strongly disagree | <input type="radio"/> | <input type="radio"/> | <input type="radio"/> | <input type="radio"/> | <input type="radio"/> | Strongly agree |

**33. I believe that Canada should train more clinician-scientists. \***

*Mark only one oval.*

|                   | 1                     | 2                     | 3                     | 4                     | 5                     |                |
|-------------------|-----------------------|-----------------------|-----------------------|-----------------------|-----------------------|----------------|
| Strongly disagree | <input type="radio"/> | <input type="radio"/> | <input type="radio"/> | <input type="radio"/> | <input type="radio"/> | Strongly agree |

**34. I believe the CIHR should fund Canadian MD/PhD programs. \***

*Mark only one oval.*

|                   | 1                     | 2                     | 3                     | 4                     | 5                     |                |
|-------------------|-----------------------|-----------------------|-----------------------|-----------------------|-----------------------|----------------|
| Strongly disagree | <input type="radio"/> | <input type="radio"/> | <input type="radio"/> | <input type="radio"/> | <input type="radio"/> | Strongly agree |

**Part 5 of 6: Publications, funding, and debt**

35. **Have you co-authored a recent peer-reviewed manuscript?**

*Mark only one oval.*

- ☐ Yes, within the last 12 months
- ☐ Yes, within the last 36 months
- ☐ No

36. **How many first author, peer-reviewed manuscripts did you publish during or resulting directly from your MD/PhD training?**

*Mark only one oval.*

- ☐ 0
- ☐ 1
- ☐ 2
- ☐ 3
- ☐ 4
- ☐ 5 or more

37. **How many peer-reviewed manuscripts did you co-author during or resulting directly from your MD/PhD training?**

*Mark only one oval.*

- ☐ 0
- ☐ 1-3
- ☐ 4-6
- ☐ 7-9
- ☐ 10 or more

38. **Have you been the principal investigator on a recent funded project? \***

*Mark only one oval.*

- ☐ Yes, within the last 12 months
- ☐ Yes, within the last 36 months
- ☐ No

**39. Did you receive funding during your clinician-scientist training? \***

If so, what organization(s) did you receive funding from?

*Tick all that apply.*

- ☐ CIHR MD/PhD program funding
- ☐ Other CIHR funding
- ☐ NSERC
- ☐ SSHRC
- ☐ National/international charitable foundation
- ☐ Private/extramural
- ☐ Other federal granting agency
- ☐ No, I did not receive funding during my clinician-scientist training
- ☐ Other: .....

**40. Have you received funding since completing your clinician-scientist training? \***

If so, what organization(s) have you received funding from?

*Tick all that apply.*

- ☐ CIHR
- ☐ NSERC
- ☐ SSHRC
- ☐ National/international charitable foundation
- ☐ Private/extramural
- ☐ Other federal granting agency
- ☐ No, I have not received funding since completing my clinician-scientist training
- ☐ Other: .....

**41. Did you have outstanding debt from medical education or clinician-scientist training when you completed your training? \***

*Mark only one oval.*

- ☐ No
- ☐ Yes, less than \$20,000
- ☐ Yes, between \$20,000 and \$50,000
- ☐ Yes, between \$50,000 and \$100,000
- ☐ Yes, more than \$100,000

## **Part 6 of 6: Consent**

By completing this survey, you are consenting to participate in this research.

STUDY TITLE

Canadian MD/PhD program graduate survey

YOUR PARTICIPATION IS VOLUNTARY

Your participation is voluntary. You have the right to refuse to participate in this survey. If you decide to participate, you may still choose to withdraw from the survey at any time. Before you decide, it is important for you to understand what the research involves. This consent form will tell you about the study and why the research is being done. Please ask the investigators of the study to explain any words and/or phrases that are not clear to you. If you wish to participate in this study, you will be asked to consent to this form.

By completing the questionnaire, you are consenting to participate in this research.

#### PURPOSE OF THE STUDY

To provide comprehensive data about the demographics, education and training, current appointments and career trajectories, publications, funding, and debt of the Canadian MD/PhD program graduate population.

#### WHO CAN PARTICIPATE IN THIS STUDY?

Graduates of combined MD/PhD programs across Canada.

#### WHAT DOES THE STUDY INVOLVE?

##### Overview

This study will examine basic demographic statistics, MD/PhD program satisfaction, and career development.

##### Time Requirement

If you decide to participate in this study, the total estimated time required for completing the survey is approximately 10 minutes.

#### WHAT ARE THE POSSIBLE HARMS AND DISCOMFORTS?

There are no possible harms or discomforts that should result from this survey.

#### WHAT ARE THE POTENTIAL BENEFITS OF PARTICIPATING?

This survey will assess the value of clinician-scientist training programs in Canada and the degree to which combined MD/PhD programs support Canadian leadership in translational research.

#### WHAT IF NEW INFORMATION BECOMES AVAILABLE THAT MAY AFFECT MY DECISION TO PARTICIPATE?

As your participation is voluntary, you may withdraw from this survey at any time.

#### WHAT HAPPENS IF I DECIDE TO WITHDRAW MY CONSENT TO PARTICIPATE?

You may withdraw from this study at any time without giving reasons. If you choose to enter the study and then decide to withdraw at a later time, you have the right to request the withdrawal of your information collected during the study. This request will be respected to the extent possible. Please note however that there may be exceptions where the data will not be able to be withdrawn for example where the data is no longer identifiable (meaning it cannot be linked in any way back to your identity) or where the data has been merged with other data. If you would like to request the withdrawal of your data, please let the directors of this survey know.

#### WILL MY TAKING PART IN THIS STUDY BE KEPT CONFIDENTIAL?

Your confidentiality will be respected. However, survey records identifying you may be inspected in the presence of the study investigators or their designates by representatives of the UBC Behavioural Research Ethics Board for the purpose of monitoring the research. No information or records that disclose your identity will be published without your consent, nor will any information or records that disclose your identity be removed or released without your consent unless required by law.

You will be assigned a unique study number as a participant in this study. This number will not include any personal information that could identify you. Only this number will be used on any research-related information collected about you during the course of this study, so that your identity as a participant in this study will be kept confidential. Information that contains your identity will remain only with the investigators and/or designate. The list that matches your name to the unique study number that is used on your research-related information will not be removed or released without your consent unless required by law.

This online survey is hosted by a web survey company located in the USA and as such is subject to U.S. laws, in particular, the U.S. Patriot Act which allows authorities access to the records of internet service providers. If you choose to participate in the survey, you understand that your responses to the survey questions will be stored and accessed in the USA. The security and privacy policy for the web survey company can be found at the following link: <https://www.google.com/policies/privacy/>. Following the completion of the survey, on or prior to January 1, 2017, all data will be erased from American servers, and transferred to an encrypted web server hosted by UBC and password-protected.

#### WHAT WILL THE STUDY COST ME?

There will be no cost to you for participating in the study.

**WHO DO I CONTACT IF I HAVE QUESTIONS ABOUT THE STUDY DURING MY PARTICIPATION?**

If you have any questions or desire further information about this study before or during participation, or if you experience any adverse effects, you can contact the investigators Michael Skinnider, Jordan Squair, Jennifer Ji, and David Twa by phone at 604-970-2699 or by email at [jordansquair@alumni.ubc.ca](mailto:jordansquair@alumni.ubc.ca). The principal investigator of this study is Dr. Lynn Raymond, director of the UBC MD/PhD program and professor, Department of Psychiatry, who can be reached by phone at 604-822-0723 or by email at [lynn.raymond@ubc.ca](mailto:lynn.raymond@ubc.ca).

**WHO DO I CONTACT IF I HAVE ANY QUESTIONS OR CONCERNS ABOUT MY RIGHTS AS A RESEARCH PARTICIPANT?**

If you have any concerns or complains about your rights as a research participant and/or your experiences while participating in this study, contact the Research Participant Complaint Line in the University of British Columbia Office of Research Ethics by e-mail at [RSIL@ors.ubc.ca](mailto:RSIL@ors.ubc.ca) or by phone at 604-822-8598 (Toll Free: 1-877-822-8598).

**42. Please indicate your consent to participate in this research. \***

*Tick all that apply.*

☐ I consent to participate in this research

**43. Please indicate your consent for your anonymized response to be released to CITAC and CSCI.**

CITAC is the Clinician Investigator Trainee Association of Canada, which represents MD/MSc, MD/PhD, CIP, surgeon-scientist, and other clinical investigator trainees within Canada. The CSCI is the Canadian Society for Clinical Investigation, which represents Canadian physician-scientists. Your name, age, sex, ethnicity, entry date, graduation date, and time to graduation will not be released.

*Tick all that apply.*

☐ I consent to release anonymized data to CITAC and CSCI

**44. Please indicate your consent for your anonymized response to be released to your MD/PhD program.**

Your name, age, sex, ethnicity, entry date, graduation date, and time to graduation will not be released.

*Tick all that apply.*

☐ I consent to release anonymized data to my MD/PhD program

---

Powered by

 **Google Forms**
